# Supplementary material
Source: publisher site journal article supplement (https://www.dovepress.com/article/545221)
Supplement: Supplementary file 1 [file 545221%20Revised%20Supplementary%20Material.docx]

**Supplementary Materials**

**Appendix 1:** Search Strategies

**Embase**

Database: Embase <1974 to 2022 June 16>

Search Strategy:

--------------------------------------------------------------------------------

1 ketamine/po [Oral Drug Administration] (638)

2 pain/dt, th [Drug Therapy, Therapy] (50726)

3 human/ (23594495)

4 ketamine/ae, it, dt, to, pr, pk, pd, pv, tm [Adverse Drug Reaction, Drug Interaction, Drug Therapy, Drug Toxicity, Pharmaceutics, Pharmacokinetics, Pharmacology, Special Situation for Pharmacovigilance, Unexpected Outcome of Drug Treatment] (16907)

5 esketamine/ (1054)

6 2 and 3 (45097)

7 1 and 4 (542)

8 5 or 7 (1577)

9 6 and 8 (119)

10 limit 9 to english language (111)

11 2 and 8 (125)

12 limit 11 to english language (116)

13 10 or 12 (116)

**Web of Science**

Link to Web of Science strategy:<https://www.webofscience.com/wos/woscc/summary/96cb07a0-b570-4c1a-8e94-d48f10a99aba-3e9ae40d/relevance/1>

**PubMed**

| **Search number** | **Query** | **Search Details** | **Results** |
| --- | --- | --- | --- |
| **16** | **English[Language] AND #15** | **"English"[Language] AND (1965/01/01:3000/12/31[Date - Publication] AND ((("adverse effects"[MeSH Subheading] OR ("Metabolic Side Effects of Drugs and Substances"[MeSH Terms] OR "Drug-Related Side Effects and Adverse Reactions"[MeSH Terms] OR "Long Term Adverse Effects"[MeSH Terms] OR "Physiological Effects of Drugs"[MeSH Terms])) AND ("pain"[MeSH Terms] AND "humans"[MeSH Terms] AND (("ketamine"[MeSH Terms] OR "esketamine"[Title/Abstract]) AND "humans"[MeSH Terms]))) OR (("pharmacologic actions"[MeSH Terms] OR "Physiological Effects of Drugs"[MeSH Terms]) AND ("pain"[MeSH Terms] AND "humans"[MeSH Terms] AND (("ketamine"[MeSH Terms] OR "esketamine"[Title/Abstract]) AND "humans"[MeSH Terms])))))** | **1,245** |
| **15** | **("1965/01/01"[Date - Publication] : "3000"[Date - Publication]) AND #14** | **1965/01/01:3000/12/31[Date - Publication] AND ((("adverse effects"[MeSH Subheading] OR ("Metabolic Side Effects of Drugs and Substances"[MeSH Terms] OR "Drug-Related Side Effects and Adverse Reactions"[MeSH Terms] OR "Long Term Adverse Effects"[MeSH Terms] OR "Physiological Effects of Drugs"[MeSH Terms])) AND ("pain"[MeSH Terms] AND "humans"[MeSH Terms] AND (("ketamine"[MeSH Terms] OR "esketamine"[Title/Abstract]) AND "humans"[MeSH Terms]))) OR (("pharmacologic actions"[MeSH Terms] OR "Physiological Effects of Drugs"[MeSH Terms]) AND ("pain"[MeSH Terms] AND "humans"[MeSH Terms] AND (("ketamine"[MeSH Terms] OR "esketamine"[Title/Abstract]) AND "humans"[MeSH Terms]))))** | **1,366** |
| **14** | **#12 OR #13** | **(("adverse effects"[MeSH Subheading] OR ("Metabolic Side Effects of Drugs and Substances"[MeSH Terms] OR "Drug-Related Side Effects and Adverse Reactions"[MeSH Terms] OR "Long Term Adverse Effects"[MeSH Terms] OR "Physiological Effects of Drugs"[MeSH Terms])) AND ("pain"[MeSH Terms] AND "humans"[MeSH Terms] AND (("ketamine"[MeSH Terms] OR "esketamine"[Title/Abstract]) AND "humans"[MeSH Terms]))) OR (("pharmacologic actions"[MeSH Terms] OR "Physiological Effects of Drugs"[MeSH Terms]) AND ("pain"[MeSH Terms] AND "humans"[MeSH Terms] AND (("ketamine"[MeSH Terms] OR "esketamine"[Title/Abstract]) AND "humans"[MeSH Terms])))** | **1,366** |
| **13** | **#7 AND #11** | **("pharmacologic actions"[MeSH Terms] OR "physiological effects of drugs"[MeSH Terms]) AND ("pain"[MeSH Terms] AND "humans"[MeSH Terms] AND (("ketamine"[MeSH Terms] OR "esketamine"[Title/Abstract]) AND "humans"[MeSH Terms]))** | **1,276** |
| **12** | **#6 AND #11** | **("adverse effects"[MeSH Subheading] OR ("Metabolic Side Effects of Drugs and Substances"[MeSH Terms] OR "Drug-Related Side Effects and Adverse Reactions"[MeSH Terms] OR "Long Term Adverse Effects"[MeSH Terms] OR "Physiological Effects of Drugs"[MeSH Terms])) AND ("pain"[MeSH Terms] AND "humans"[MeSH Terms] AND (("ketamine"[MeSH Terms] OR "esketamine"[Title/Abstract]) AND "humans"[MeSH Terms]))** | **1,357** |
| **11** | **#8 AND #9** | **"pain"[MeSH Terms] AND "humans"[MeSH Terms] AND (("ketamine"[MeSH Terms] OR "esketamine"[Title/Abstract]) AND "humans"[MeSH Terms])** | **1,530** |
| **10** | **#6 AND #9** | **("adverse effects"[MeSH Subheading] OR ("Metabolic Side Effects of Drugs and Substances"[MeSH Terms] OR "Drug-Related Side Effects and Adverse Reactions"[MeSH Terms] OR "Long Term Adverse Effects"[MeSH Terms] OR "Physiological Effects of Drugs"[MeSH Terms])) AND (("ketamine"[MeSH Terms] OR "esketamine"[Title/Abstract]) AND "humans"[MeSH Terms])** | **5,690** |
| **9** | **#1 AND #3** | **("ketamine"[MeSH Terms] OR "esketamine"[Title/Abstract]) AND "humans"[MeSH Terms]** | **8,213** |
| **8** | **#2 AND #3** | **"pain"[MeSH Terms] AND "humans"[MeSH Terms]** | **402,073** |
| **7** | **(Pharmacologic Actions[MeSH Terms]) OR (Physiological Effects of Drugs[MeSH Terms])** | **"pharmacologic actions"[MeSH Terms] OR "physiological effects of drugs"[MeSH Terms]** | **4,124,443** |
| **6** | **#5 OR #4** | **"adverse effects"[MeSH Subheading] OR "Metabolic Side Effects of Drugs and Substances"[MeSH Terms] OR "Drug-Related Side Effects and Adverse Reactions"[MeSH Terms] OR "Long Term Adverse Effects"[MeSH Terms] OR "Physiological Effects of Drugs"[MeSH Terms]** | **3,856,283** |
| **5** | **Adverse effects[MeSH Subheading]** | **"adverse effects"[MeSH Subheading]** | **2,408,247** |
| **4** | **"Metabolic Side Effects of Drugs and Substances"[Mesh] OR "Drug-Related Side Effects and Adverse Reactions"[Mesh] OR "Long Term Adverse Effects"[Mesh] OR "Physiological Effects of Drugs"[Mesh]** | **"Metabolic Side Effects of Drugs and Substances"[MeSH Terms] OR "Drug-Related Side Effects and Adverse Reactions"[MeSH Terms] OR "Long Term Adverse Effects"[MeSH Terms] OR "Physiological Effects of Drugs"[MeSH Terms]** | **1,904,077** |
| **3** | **humans[MeSH Terms]** | **"humans"[MeSH Terms]** | **20,544,444** |
| **2** | **Pain[MeSH Terms]** | **"pain"[MeSH Terms]** | **437,121** |
| **1** | **(ketamine[MeSH Terms]) OR (esketamine[Title/Abstract])** | **"ketamine"[MeSH Terms] OR "esketamine"[Title/Abstract]** | **14,321** |

# **Supplementary Table 1**: EndNote Table of Studies for Full-Paper Review

| **Author(s)** | **Year** | **Title** | **Journal** |
| --- | --- | --- | --- |
| Amin, P., et al17 | 2014 | Case report: efficacy and tolerability of ketamine in opioid-refractory cancer pain | J Pain Palliat Care Pharmacother |
| Benítez-Rosario, M. A., et al18 | 2003 | A retrospective comparison of the dose ratio between subcutaneous and oral ketamine | J Pain Symptom Manage |
| Benítez-Rosario, M. A., et al19 | 2011 | A strategy for conversion from subcutaneous to oral ketamine in cancer pain patients: effect of a 1:1 ratio | J Pain Symptom Manage |
| Bredlau, A. L., et al20 | 2013 | Oral ketamine for children with chronic pain: a pilot phase 1 study | J Pediatr |
| Broadley, K. E., et al21 | 1996 | Ketamine injection used orally | Palliat Med |
| Chen, C., et al22 | 2021 | Preanesthetic nebulized ketamine vs preanesthetic oral ketamine for sedation and postoperative pain management in children for elective surgery: A retrospective analysis for effectiveness and safety | Medicine (Baltimore) |
| Chong, C. C. and S. A. Schug23 | 2021 | Efficacy and Tolerability of Oral Compared with Sublingual Ketamine Lozenges as Rescue Analgesics in Adults for Acute Pain: The OSKet Trial | Clin Drug Investig |
| Cvrcek, P.24 | 2008 | Side effects of ketamine in the long-term treatment of neuropathic pain | Pain Med 9(2): 253-257 |
| Dash, S. K., et al25 | 2018 | Effect of Oral Ketamine as Adjuvant for Treatment of Neuropathic Pain in Cancer Patients | Journal of Evolution of Medical and Dental Sciences-Jemds |
| Eide, P. K. and A. Stubhaug26 | 1997 | Relief of glossopharyngeal neuralgia by ketamine-induced N-methyl-aspartate receptor blockade | Neurosurgery |
| Enarson, M. C., et al27 | 1999 | Clinical experience with oral ketamine | J Pain Symptom Manage |
| Fallon, M. T., et al28 | 2018 | Oral Ketamine vs Placebo in Patients With Cancer-Related Neuropathic Pain: A Randomized Clinical Trial | JAMA Oncol |
| Fisher, K. and N. A. Hagen29 | 1999 | Analgesic effect of oral ketamine in chronic neuropathic pain of spinal origin: a case report | J Pain Symptom Manage |
| Fitzgibbon, E. J., et al30 | 2002 | Low dose ketamine as an analgesic adjuvant in difficult pain syndromes: A strategy for conversion from parenteral to oral ketamine | Journal of Pain and Symptom Management |
| Furuhashi-Yonaha, A., et al31 | 2002 | Short- and long-term efficacy of oral ketamine in eight chronic-pain patients | Can J Anaesth |
| Haines, D. R. and S. P. Gaines32 | 1999 | N of 1 randomised controlled trials of oral ketamine in patients with chronic pain | Pain |
| Heidari, S. M., et al33 | 2006 | Effect of oral ketamine on the postoperative pain and analgesic requirement following orthopedic surgery | Acta Anaesthesiol Taiwan |
| Inomata, S., et al34 | 2005 | Combined therapy with clonidine and amantadine may act in two stages of glutamate-mediated neuropathic pain caused by a needle puncture in an upper extremity | Anesth Analg |
| Jennings, C. A., et al35 | 2013 | Oral ketamine for sickle cell crisis pain refractory to opioids | J Pain Palliat Care Pharmacother |
| Juel, J., et al36 | 2015 | Study protocol for a randomised, double-blinded, placebo-controlled, clinical trial of S-ketamine for pain treatment in patients with chronic pancreatitis. RESET Trial | BMJ Open |
| Kamel, A. A. F. and O. A. I. Amin37 | 2020 | Analgo-Sedative Effects of Oral or Nebulized Ketamine in Preschoolers Undergoing Elective Surgery: A Comparative, Randomized, Double-Blind Study | Pain Physician |
| Kannan, T. R., et al38 | 2002 | Oral ketamine as an adjuvant to oral morphine for neuropathic pain in cancer patients | J Pain Symptom Manage |
| Kapur, N. and R. Friedman39 | 2002 | Oral ketamine: a promising treatment for restless legs syndrome | Anesth Analg |
| Kaviani, N., et al40 | 2011 | The effect of orally administered ketamine on requirement for anesthetics and postoperative pain in mandibular molar teeth with irreversible pulpitis | J Oral Sci |
| Kim, K., et al41 | 2013 | Ketamine for acute neuropathic pain in patients with spinal cord injury | J Clin Neurosci |
| Klepstad, P. and P. C. Borchgrevink42 | 1997 | Four years' treatment with ketamine and a trial of dextromethorphan in a patient with severe post-herpetic neuralgia | Acta Anaesthesiol Scand |
| Kubota, T. and A. Miyata43 | 2005 | Successful use of ketamine for intractable burning pain of HTLV-1-associated myelopathy | J Pain Symptom Manage 30(5): 397-399 |
| Kundra, P., et al44 | 2013 | Oral ketamine and dexmedetomidine in adults' burns wound dressing-A randomized double blind cross over study | Burns |
| Lauretti, G. R., et al12 | 1999 | Oral ketamine and transdermal nitroglycerin as analgesic adjuvants to oral morphine therapy for cancer pain management | Anesthesiology |
| MacKintosh, D., et al45 | 2012 | Ketamine: a real-world experience in cancer pain | J Palliat Med |
| Marchetti, F., et al46 | 2015 | Efficacy and safety of oral ketamine for the relief of intractable chronic pain: A retrospective 5-year study of 51 patients | Eur J Pain |
| Mercadante, S., et al47 | 2005 | Alternative treatments of breakthrough pain in patients receiving spinal analgesics for cancer pain | J Pain Symptom Manage |
| Mikkelsen, S., et al48 | 2000 | Effect of oral ketamine on secondary hyperalgesia, thermal and mechanical pain thresholds, and sedation in humans | Reg Anesth Pain Med |
| Moazam, C., et al49 | 2019 | Ketamine: When Delirium and Desperation Call for a Hero | J Pain Palliat Care Pharmacother |
| Nikolajsen, L., et al50 | 1997 | Oral ketamine therapy in the treatment of post amputation stump pain | Acta Anaesthesiol Scand |
| Norambuena, C., et al51 | 2013 | Oral ketamine and midazolam for pediatric burn patients: A prospective, randomized, double-blind study | Journal of Pediatric Surgery |
| Prommer, E.52 | 2003 | Ketamine to control pain | J Palliat Med |
| Qureshi, F. A., et al53 | 1995 | EFFICACY OF ORAL KETAMINE FOR PROVIDING SEDATION AND ANALGESIA TO CHILDREN REQUIRING LACERATION REPAIR | Pediatric Emergency Care |
| Rayala, S., et al54 | 2019 | Low-dose Oral Ketamine as a Procedural Analgesia in Pediatric Cancer Patients Undergoing Bone Marrow Aspirations at a Resource-limited Cancer Hospital in India | Indian Journal of Palliative Care |
| Rayala, S., et al55 | 2019 | Low-Dose Oral Ketamine for Procedural Analgesia in Pediatric Cancer Patients Undergoing Lumbar Puncture at a Resource-Limited Cancer Hospital in India | Journal of Palliative Medicine |
| Rigo, F. K., et al56 | 2017 | Management of Neuropathic Chronic Pain with Methadone Combined with Ketamine: A Randomized, Double Blind, Active-Controlled Clinical Trial | Pain Physician |
| Rothrock, S. G. and N. E. Johnson57 | 1989 | Pain management in the pediatric emergency department | Pediatr Emerg Care |
| Ryan, N. M., et al58 | 2019 | Low-dose ketamine provides poor analgesia for pain in redback spider envenoming | Br J Clin Pharmacol 85(10): 2423-2427 |
| Sakai, T., et al59 | 2004 | Multiple sclerosis with severe pain and allodynia alleviated by oral ketamine | Clin J Pain |
| Saroyan, J. M., et al60 | 2009 | The use of oral ketamine for analgesia with dressing change in an infant with epidermolysis bullosa: report of a case | Pediatr Dermatol |
| Singh, C., et al61 | 2014 | A comparative evaluation of analgo-sedative effects of oral dexmedetomidine and ketamine: a triple-blind, randomized study | Pediatric Anesthesia |
| Soto, E., et al62 | 2012 | Oral ketamine in the palliative care setting: a review of the literature and case report of a patient with neurofibromatosis type 1 and glomus tumor-associated complex regional pain syndrome | Am J Hosp Palliat Care |
| Tobias, J. D., et al63 | 1992 | ORAL Ketamine Premedication to Alleviate the Distress of Invasive Procedures in Pediatric Oncology Patients | Pediatrics |
| Ugur, F., et al64 | 2009 | Oral ketamine for pain relief in a child with abdominal malignancy | Pain Med 10(1): 120-121 |
| Urch, C. E. and J. H. Chamberlain65 | 1998 | Ketamine analgesia in vasculitic pain | Br J Rheumatol |
| Vick, P. G. and T. J. Lamer66 | 2001 | Treatment of central post-stroke pain with oral ketamine | Pain |
| Waldfogel, J. M., et al67 | 2016 | Successful Treatment of Opioid-Refractory Cancer Pain with Short-Course, Low-Dose Ketamine | J Pain Palliat Care Pharmacother |
| Yamamoto, T., et al68 | 2016 | Importance of Pharmacological Evaluation in the Treatment of Poststroke Pain by Spinal Cord Stimulation | Neuromodulation |

**Supplementary Table 2:** Articles evaluated according to the Sackett Scale

| Obs | PI | Condition | Design | Level of Evidence | Ketamine Titration | Therapeutic Dose | Ketamine as Add-on | Baseline Level | Efficacy Achieved | Day of Efficacy Assessment | Reduction in Other Analgesics | Day Reduction Assessed | AEs Assessed | AEs Greater Than Control | Level of Baseline Pain |
| --- | --- | --- | --- | --- | --- | --- | --- | --- | --- | --- | --- | --- | --- | --- | --- |
| 1 | Lauretti12 | Cancer | RCT | I | N | Y | Y | VAS<4 | Y | Day1 | Y | Day3 | 0 Y | N | Other |
| 2 | Dash25 | Cancer | Cohort | III | N | N | N | NRS>6 | Y | Day30 | NA | NA | Y | NA | Severe |
| 3 | Kim41 | Spinal Injury | Cohort | III | Y | Y | Y | VAS>4 | Y | Day17 | NA | NA | Y | NA | Moderate |
| 4 | Ryan58 | Insect Bite | Cohort | III | Y | Y | N | NA VNRS | Y | Min30 | NA | NA | Y | NA | Other |
| 5 | Furuhasi Yonaha31 | Mix | Cohort | III | Y | Y | N | VAS>=5 | Y | Day7 | Y | Day7 | Y | NA | Moderate |
| 6 | Haines32 | Mix | Cohort | III | Y | N | N | Anagesia | Y | Day7 | NA | NA | Y | NA | Other |
| 7 | Heidari33 | Surgery | RCT | I | N | Y | Y | NA | Y | Day1 | Y | Day1 | Y | N | Other |
| 8 | Enarson27 | Mix | Cohort | III | Y | Y | N | NA | N | Year1 | Y | Year | 1 Y | NA | UNK |
| 9 | Kamel37 | Surgery | RCT | II | N | Y | Y | NA | Y | Hour4 | NA | NA | Y | NA | Other |
| 10 | Kannan38 | Cancer | Cohort | III | N | Y | N | NRS>6 | Y | Day60 | Y | NA | Y | NA | Moderate |
| 11 | Kaviani40 | Surgery | RCT | II | N | Y | Y | NA | Y | IntraOp | Y | Day1 | N | A NA | Other |
| 12 | Kundra44 | Wound Care | RCT | I | N | Y | Y | VASMean86 | Y | Hour2 | NA | NA | Y | N | Other |
| 13 | MacKintosh45 | Cancer | Case Series | V | UNK | Y | N | NA | N | Day35 | N | Day3 | 5 N | NA | UNK |
| 14 | Qureshi53 | Wound Care | RCT | II | N | Y | Y | NA | Y | Procedure | NA | NA | Y | Y | Other |
| 15 | Rayala54 | Aspiration | RCT | I | N | N | Y | NA | N | Procedure | e NA | NA | Y | N | Other |
| 16 | Rigo56 | Mix | RCT | I | N | Y | N | MeanVAS>7 | Y | Day90 | UN | K NA | Y | N | Severe |
| 17 | Tobias63 | Procedure | Case Series | V | N | Y | UN | K NA | NA | NA | NA | NA | Y | NA | Other |
| 18 | Norambuena51 | Wound Care | RCT | II | N | Y | Y | NA | Y | Procedure | e NA | NA | Y | Y | Other |
| 19 | Benitez Rosario19 | Cancer | Cohort | III | Y | Y | N | NRS>=7 | Y | Day5 | N | NA | Y | NA | Severe |
| 20 | Chong23 | Mix | RCT | II | N | N | N | NRS>=5 | Y | Hour4 | NA | NA | Y | NA | Moderate |
| 21 | Cvrcek24 | Mix | Cohort | III | Y | Y | N | MeanVAS7 | Y | Day30 | NA | NA | Y | NA | Severe |
| 22 | Fallon28 | Cancer | RCT | I | Y | Y | Y | SFMGPS>=5 | N | Day16 | NA | NA | Y | N | Slight |
| 23 | Chen22 | Surgery | Cohort | III | N | Y | Y | NA | Y | Discharge | e Y | N | Y | N | Other |
| 24 | Bredlau20 | Mix | Cohort | III | N | Y | N | NRS>=4 | Y | Day14 | NA | NA | Y | NA | Moderate |
| 25 | Marchetti46 | Mix | Cohort | III | Y | Y | N | UNK | Y | Day28 | NA | NA | Y | NA | Other |
| 26 | Singh61 | Dental | RCT | II | N | Y | Y | NA | Y | PostOp | NA | NA | Y | N | Other |
| 27 | Mercadante47 | Cancer | Case Series | V | N | Y | Y | Moderate | Y | PostDose | NA | NA | Y | NA | Moderate |

**Appendix 2:** Sackett Scale from McGraw Hill

| Level of Evidence – Based on Sackett | |
| --- | --- |
| Evidence Level | Study Type |
| 1a (Strong) | Well designed meta-analysis,  or 2 or more ‘high’ quality RCTs (PEDro Scale scores ≥6) that show similar findings |
| 1b (Moderate) | One RCT of ‘high’ quality (PEDro Scale score ≥6) |
| 2a (Limited) | At least one ‘fair’ quality RCT (PEDro Scale score=4-5) |
| 2b (Limited) | At least one well-designed non-experimental study: non-randomized controlled trial; quasi-experimental studies; cohort studies with multiple baselines;  single subject series with multiple baselines |
| 3 (Consensus) | Agreement by an expert panel, a group of professionals in the field or  a number of pre-post design studies with similar results |
| 4 (Conflicting) | Conflicting evidence of two or more equally designed studies |
| 5 (No Evidence) | No well-designed studies: “Poor” quality RCTs with PEDro scores ≤ 3;  only case studies/case descriptions, or cohort studies/single subject series with no multiple baselines) |

Further description of the levels:

Level 1a (Strong)

Two randomized controlled trials (RCT) of high quality (PEDro = 6) or a meta-analysis that finds hippotherapy to be effective (or not effective) in improving sitting balance would enable a 1a rating of hippotherapy for improving sitting balance.

Level 1b (Moderate)

One randomized controlled trial (RCT) of high quality (PEDro = 6) that finds hippotherapy to be effective (or not effective) in improving sitting balance would enable a 1b rating of hippotherapy for improving sitting balance.

Level 2a and 2b (Limited)

One or more fair quality RCTss (PEDro = 4-5) that found hippotherapy to be effective (or not effective) in improving sitting balance would enable a 2a rating, while lower quality studies such as poor quality RCT's, non-randomized trials and strong single subject designs (for example those with multiple baselines) would receive a level of evidence rating of 2b.

Level 3 (Consensus)

A consensus by an expert panel or a group of professionals in the field or a number of pre-post studies all with similar results that hippotherapy was effective or not effective would receive a level of evidence rating of 3.

Level 4 (Conflicting)

A level of evidence of 4 indicates conflicting findings of equally well-designed studies, for example, one high quality study finding hippotherapy to be effective for improving sitting balance, the other high quality study finding it not effective.

Level 5 (No evidence)

No well-designed experimental studies for the intervention.
